# Supplementary material for: Effect of ammonia and formic acid on the CH3O˙ + O2 reaction: a quantum chemical investigation
Source: Royal Society of Chemistry journal article supplement (doi:10.1039/c9cp04612g), 2019-12-20
Supplement: c9cp04612g1.pdf [file c9cp04612g1.pdf]

**Suplimentary Information for**  
**Effect of ammonia and formic acid on  $\text{CH}_3\text{O}^\bullet +$**   
 **$\text{O}_2$  reaction: A quantum chemical investigation**

Amit Kumar,<sup>†</sup> Subhasish Mallick,<sup>†</sup> Brijesh Kumar Mishra,<sup>‡</sup> and Pradeep  
Kumar<sup>\*,†</sup>

<sup>†</sup>*Department of Chemistry, Malaviya National Institute of Technology Jaipur, Jaipur,  
302017, India*

<sup>‡</sup>*International Institute of Information Technology Bangalore, Bangalore, 560100, India*

E-mail: pradeep.chy@mnit.ac.in

| Sl. No. | Contents                                                                                                                                                                                                                  |
|---------|---------------------------------------------------------------------------------------------------------------------------------------------------------------------------------------------------------------------------|
| 1       | Formal proof for same value of trimolecular rate constant for path A, B and C                                                                                                                                             |
| 2       | <b>Table S1:</b> Optimized geometries in cartesian coordinates and all normal mode frequencies calculated at the MN15L/aug-cc-pVTZ level of theory.                                                                       |
| 3       | <b>Table S2:</b> Bimolecular rate constant $k_b$ in ( $\text{cm}^3 \text{ molecule}^{-1} \text{ sec}^{-1}$ ) for formic acid catalysed channel within temperature range 213-900 K                                         |
| 4       | <b>Table S3:</b> Bimolecular rate constant $k_b$ in ( $\text{cm}^3 \text{ molecule}^{-1} \text{ sec}^{-1}$ ) for ammonia catalysed channel within temperature range 213-900 K                                             |
| 5       | <b>Table S4:</b> Relative energies ( $\Delta E_{AM}$ ) including ZPE in kcal mol <sup>-1</sup> for the complexes of AM catalyzed channels with respect to the isolated reactants at the MN15L/aug-cc-pVTZ level of theory |
| 6       | <b>Table S5:</b> Relative energies ( $\Delta E_{FA}$ ) including ZPE in kcal mol <sup>-1</sup> for the complexes of FA catalyzed channels with respect to the isolated reactants at the MN15L/aug-cc-pVTZ level of theory |
| 7       | <b>Table S6:</b> Termolecular rate constant $k_t$ in ( $\text{cm}^6 \text{ molecule}^{-2} \text{ sec}^{-1}$ ) for formic acid catalysed channel within temperature range 213-900K                                         |
| 8       | <b>Table S7:</b> Termolecular rate constant $k_t$ in ( $\text{cm}^6 \text{ molecule}^{-2} \text{ sec}^{-1}$ ) for ammonia catalysed channel within temperature range 213-900K                                             |
| 9       | <b>Figure S1:</b> Gibbs free energy profile for $\text{CH}_3\text{O}^\bullet + \text{O}_2$ reaction in presence of AM calculated at MN15L/aug-cc-pVTZ level                                                               |
| 10      | <b>Figure S2:</b> Gibbs free energy profile for $\text{CH}_3\text{O}^\bullet + \text{O}_2$ reaction in presence of FA calculated at MN15L/aug-cc-pVTZ level                                                               |
| 11      | <b>Table S8:</b> Absolute energies in (Hartree) for the relevant species at CCSD(T) level of theory.                                                                                                                      |
| 12      | <b>Table S9:</b> Absolute energies in (Hartree) for the relevant species at post CCSD(T) level of theory.                                                                                                                 |
| 14      | <b>Figure S3:</b> Reaction scheme for the uncat $\text{CH}_3\text{O} + \text{O}_2$ reaction, at the geometries obtained at the MN15-L/aug-cc-pVTZ level (the bond lengths are in angstrom).                               |
| 15      | <b>Table S10:</b> Convergence threshold values for all the optimized geometry for all species.                                                                                                                            |

# 1 Formal proof for same value of trimolecular rate constant for path A, B and C

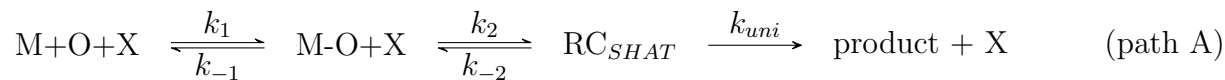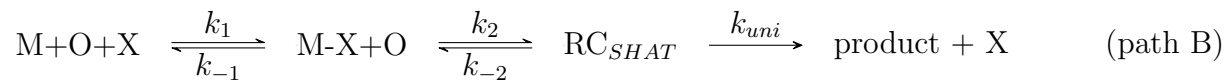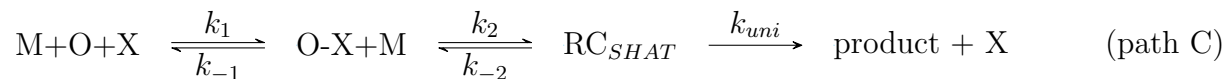

where X= AM or FA

For path A,

$$K_{eq1} = \frac{[M-O]}{[M][O]} \quad (1)$$

and

$$K_{eq2} = \frac{[RC_{SHAT}]}{[M-O][X]} \quad (2)$$

Therefore,

$$K_{eq1} \times K_{eq2} = \frac{[RC_{SHAT}]}{[M][O][X]} \quad (3)$$

Similarly, for path B,

$$K_{eq1} \times K_{eq2} = \frac{[M-X]}{[M][X]} \times \frac{[RC_{SHAT}]}{[M-X][O]} \quad (4)$$

$$K_{eq1} \times K_{eq2} = \frac{[RC_{SHAT}]}{[M][O][X]} \quad (5)$$

and similarly, for path C,

$$K_{eq1} \times K_{eq2} = \frac{[O - X]}{[O][X]} \times \frac{[RC_{SHAT}]}{[O - X][M]} \quad (6)$$

$$K_{eq1} \times K_{eq2} = \frac{[RC_{SHAT}]}{[M][O][X]} \quad (7)$$

From the equation 3, 5 and 7, it is clear that, the product of  $K_{eq1}$  and  $K_{eq2}$  is same for path A, B and C. As the  $k_{uni}$  for path A, B and C are also same, it gives same trimolecular rate  $k_t$ .

Table S1: Optimized geometries in Cartesian coordinates and normal mode frequencies of all species calculated at MN15L/aug-cc-pVTZ level of theory

| compound                         | cartesian coordinate(Å) |           |           | frequency(cm <sup>-1</sup> ) |           |           |           |
|----------------------------------|-------------------------|-----------|-----------|------------------------------|-----------|-----------|-----------|
| NH <sub>3</sub>                  | N                       | 0.00      | 0.00      | 0.122292                     | 1108.8664 | 1675.5286 | 1675.5428 |
|                                  | H                       | 0.00      | 0.937718  | -0.285349                    | 3459.8692 | 3597.8474 | 3597.8599 |
|                                  | H                       | -0.812087 | -0.468859 | -0.285349                    |           |           |           |
|                                  | H                       | 0.812087  | -0.468859 | -0.285349                    |           |           |           |
| CH <sub>3</sub> O•               | O                       | -0.010886 | 0.790359  | 0.00                         | 629.8694  | 971.5897  | 1139.3653 |
|                                  | C                       | -0.010886 | -0.571036 | 0.00                         | 1363.1103 | 1364.1439 | 1512.2245 |
|                                  | H                       | 1.064364  | -0.873809 | 0.00                         | 2887.334  | 2958.3412 | 2997.6522 |
|                                  | H                       | -0.455982 | -1.011423 | 0.917135                     |           |           |           |
|                                  | H                       | -0.455982 | -1.011423 | -0.917135                    |           |           |           |
| O <sub>2</sub>                   | O                       | 0.00      | 0.00      | 0.603041                     | 1681.6327 |           |           |
|                                  | O                       | 0.00      | 0.00      | -0.603041                    |           |           |           |
| M-O                              | C                       | 1.282028  | 0.460709  | 0.00                         | 175.1513  | 243.3366  | 341.193   |
|                                  | H                       | 1.486644  | -0.143796 | 0.903472                     | 430.6723  | 683.8525  | 1051.249  |
|                                  | H                       | 1.936139  | 1.348969  | 0.00                         | 1170.283  | 1178.3575 | 1380.6056 |
|                                  | H                       | 1.486644  | -0.143796 | -0.903472                    | 1428.9611 | 1438.1615 | 1502.262  |
|                                  | O                       | 0.00      | 1.003376  | 0.00                         | 2976.1275 | 3051.5279 | 3095.2381 |
|                                  | O                       | -1.042463 | -0.177303 | 0.00                         |           |           |           |
|                                  | O                       | -0.532736 | -1.304277 | 0.00                         |           |           |           |
| M-AM                             | C                       | -1.391934 | -0.483069 | -0.000082                    | 90.6719   | 129.8956  | 131.9038  |
|                                  | H                       | -1.963819 | -0.731408 | 0.918701                     | 133.2597  | 202.5349  | 204.3697  |
|                                  | H                       | -1.967957 | -0.729322 | -0.916841                    | 834.458   | 969.8284  | 1131.0073 |
|                                  | H                       | -0.491524 | -1.147521 | -0.002864                    | 1138.5281 | 1356.067  | 1361.559  |
|                                  | O                       | -0.895902 | 0.784169  | 0.0002                       | 1509.7705 | 1670.3679 | 1671.785  |
|                                  | N                       | 1.953472  | -0.192279 | -0.000224                    | 2871.3519 | 2955.737  | 2999.2338 |
|                                  | H                       | 2.97393   | -0.131495 | -0.00088                     | 3455.4574 | 3586.3773 | 3596.1484 |
|                                  | H                       | 1.646311  | 0.357084  | -0.807358                    |           |           |           |
|                                  | H                       | 1.647576  | 0.353677  | 0.809698                     |           |           |           |
| AM-O                             | H                       | -1.573193 | 0.45537   | -0.775782                    | 22.0066   | 71.5059   | 101.9221  |
|                                  | H                       | -1.558569 | 0.307944  | 0.840521                     | 144.966   | 163.7647  | 1107.4426 |
|                                  | O                       | 1.170942  | 0.605971  | 0.008516                     | 1672.8544 | 1675.2388 | 1678.6031 |
|                                  | O                       | 1.270676  | -0.596151 | -0.009074                    | 3456.6192 | 3593.7465 | 3596.5431 |
|                                  | N                       | -1.92406  | -0.125909 | -0.010587                    |           |           |           |
|                                  | H                       | -2.932763 | 0.039487  | 0.013833                     |           |           |           |
| RC <sub>SHAT</sub> <sup>AM</sup> | C                       | -1.024656 | 1.141663  | -0.508677                    | 79.2205   | 91.1538   | 133.3841  |
|                                  | H                       | -1.245592 | 2.196831  | -0.27351                     | 142.7143  | 179.4593  | 194.8879  |
|                                  | H                       | -1.882223 | 0.700371  | -1.050299                    | 210.131   | 247.3655  | 342.658   |
|                                  | H                       | -0.108492 | 1.086435  | -1.123134                    | 431.0343  | 682.4169  | 1043.0953 |
|                                  | O                       | -0.486063 | -0.952962 | 0.562392                     | 1112.2766 | 1173.9553 | 1178.6361 |
|                                  | O                       | -0.430181 | -1.319379 | -0.619429                    | 1376.3775 | 1427.2526 | 1437.9763 |
|                                  | O                       | -0.846145 | 0.567871  | 0.751648                     | 1497.2375 | 1672.0645 | 1677.6009 |
|                                  | H                       | 1.8326    | 0.49264   | 0.801789                     | 2981.7822 | 3069.3406 | 3096.7154 |
|                                  | H                       | 3.289099  | 0.546452  | 0.073683                     | 3459.7104 | 3595.1516 | 3599.3383 |
|                                  | N                       | 2.301224  | 0.346414  | -0.095951                    |           |           |           |
|                                  | H                       | 2.25309   | -0.661848 | -0.261711                    |           |           |           |
| RC <sub>DHAT</sub> <sup>AM</sup> | O                       | -0.804469 | -1.211407 | 0.619903                     | 77.3502   | 88.4688   | 92.5236   |
|                                  | O                       | -1.016832 | -1.412993 | -0.549684                    | 107.7264  | 137.086   | 138.1944  |
|                                  | H                       | -2.131102 | 1.306314  | 0.121058                     | 157.5942  | 171.3629  | 186.0316  |
|                                  | C                       | 1.72169   | 0.084567  | -0.560741                    | 204.6511  | 271.6647  | 787.3154  |
|                                  | H                       | 1.997843  | -0.958067 | -0.82488                     | 1014.1478 | 1121.2636 | 1141.1722 |
|                                  | H                       | 2.599208  | 0.731506  | -0.802634                    | 1363.5775 | 1375.987  | 1507.9562 |
|                                  | O                       | 1.481924  | 0.264225  | 0.770066                     | 1665.4154 | 1673.8564 | 1681.5219 |
|                                  | H                       | -1.473967 | 2.780752  | -0.060158                    | 2889.0267 | 2960.5075 | 3005.2824 |
|                                  | H                       | 0.890376  | 0.463092  | -1.193145                    | 3453.2764 | 3585.3939 | 3596.3161 |
|                                  | N                       | -1.27324  | 1.783928  | -0.165438                    |           |           |           |
|                                  | H                       | -0.584804 | 1.562914  | 0.559996                     |           |           |           |

| compound                         | geometry  |           |           | frequency |            |           |           |
|----------------------------------|-----------|-----------|-----------|-----------|------------|-----------|-----------|
| TS <sub>SHAT</sub> <sup>AM</sup> | O         | 0.415939  | 1.189397  | 0.585674  | -589.9562  | 92.1114   | 113.2896  |
|                                  | O         | 0.407226  | 1.321496  | -0.619676 | 140.1743   | 153.899   | 181.7449  |
|                                  | H         | 0.714919  | -0.085456 | -1.049658 | 254.1143   | 266.1674  | 290.5464  |
|                                  | C         | 0.983354  | -1.136471 | -0.493783 | 451.9649   | 584.1577  | 836.2303  |
|                                  | H         | 0.18313   | -1.771699 | -0.939318 | 1090.1816  | 1123.987  | 1261.9144 |
|                                  | H         | 2.013422  | -1.328768 | -0.876054 | 1271.8569  | 1355.1751 | 1511.0025 |
|                                  | O         | 0.872222  | -0.848783 | 0.761983  | 1577.6507  | 1672.7106 | 1680.4176 |
|                                  | H         | -3.07309  | -0.842332 | 0.026364  | 1882.3066  | 2885.4185 | 2968.6088 |
|                                  | H         | -1.583341 | -0.643226 | 0.66305   | 3452.2881  | 3583.3693 | 3595.3197 |
|                                  | N         | -2.188302 | -0.348713 | -0.109141 |            |           |           |
| H                                | -2.400148 | 0.634418  | 0.07845   |           |            |           |           |
| TS <sub>DHAT</sub> <sup>AM</sup> | O         | 1.490523  | -0.936008 | 0.000261  | -1206.5008 | 23.2938   | 57.4789   |
|                                  | O         | 2.331515  | -0.03852  | -0.000763 | 86.211     | 138.1969  | 193.521   |
|                                  | H         | 0.452697  | 1.325497  | 0.819753  | 214.4627   | 217.134   | 279.4012  |
|                                  | C         | -2.166427 | -0.13169  | -0.001134 | 477.4241   | 514.1818  | 534.766   |
|                                  | H         | -2.733581 | 0.114797  | 0.935572  | 1088.2852  | 1202.2819 | 1203.6688 |
|                                  | H         | -2.73127  | 0.112364  | -0.939856 | 1336.3226  | 1341.1569 | 1431.5625 |
|                                  | O         | -1.364376 | -1.127359 | 0.001157  | 1529.2957  | 1539.9445 | 1636.1252 |
|                                  | H         | -0.221686 | 2.615848  | 0.00198   | 1651.2623  | 2798.6216 | 2850.9075 |
|                                  | H         | -1.229062 | 0.888097  | -0.001073 | 3459.1073  | 3603.9979 | 3623.5609 |
|                                  | N         | -0.093524 | 1.602912  | 0.000492  |            |           |           |
| H                                | 0.454848  | 1.328245  | -0.818265 |           |            |           |           |
| PC <sup>AM</sup>                 | O         | -0.908886 | -1.363016 | 0.000805  | 18.3801    | 36.6958   | 70.0871   |
|                                  | O         | -2.093369 | -0.775069 | -0.000981 | 100.7649   | 122.2051  | 155.4415  |
|                                  | H         | -1.865649 | 0.207095  | -0.000775 | 165.1108   | 173.6001  | 264.7416  |
|                                  | C         | 2.332923  | -0.610249 | -0.000079 | 278.9659   | 448.6697  | 839.6691  |
|                                  | O         | 2.010012  | 0.552934  | 0.00034   | 1186.1244  | 1217.5571 | 1244.9007 |
|                                  | H         | 3.41136   | -0.912788 | 0.000453  | 1262.1083  | 1528.9417 | 1612.726  |
|                                  | H         | 1.5796    | -1.432072 | -0.000713 | 1678.3988  | 1688.0633 | 1830.2213 |
|                                  | N         | -0.995708 | 1.758695  | -0.000065 | 2874.376   | 2976.6157 | 3102.5499 |
|                                  | H         | -0.02189  | 1.438237  | 0.000284  | 3457.1376  | 3582.9424 | 3613.8171 |
|                                  | H         | -1.096108 | 2.366081  | -0.814896 |            |           |           |
| H                                | -1.096949 | 2.365276  | 0.815263  |           |            |           |           |
| CH <sub>2</sub> O                | C         | 0.00      | 0.00      | -0.527095 | 1199       | 1255      | 1532      |
|                                  | H         | 0.00      | 0.949407  | -1.122282 | 1847       | 2856      | 2897      |
|                                  | H         | 0.00      | -0.949407 | -1.122282 |            |           |           |
|                                  | O         | 0.00      | 0.00      | 0.675892  |            |           |           |
| HO <sub>2</sub> •                | O         | 0.055586  | -0.608155 | 0.00      | 1199       | 1463      | 3645      |
|                                  | H         | -0.889376 | -0.865124 | 0.00      |            |           |           |

| compound                         | geometry |           |           | frequency |           |           |           |
|----------------------------------|----------|-----------|-----------|-----------|-----------|-----------|-----------|
| FA-M                             | C        | -2.067835 | 0.482742  | 0.057368  | 21.0123   | 116.7312  | 137.851   |
|                                  | H        | -3.169547 | 0.576759  | 0.082918  | 145.1759  | 161.5058  | 186.3133  |
|                                  | H        | -1.585582 | 0.970234  | 0.933194  | 577.3074  | 671.5516  | 880.5225  |
|                                  | H        | -1.647951 | 1.068501  | -0.794613 | 1038.5615 | 1075.2122 | 1190.3644 |
|                                  | O        | -1.629173 | -0.801503 | -0.073568 | 1211.4456 | 1324.0154 | 1372.0023 |
|                                  | H        | 2.828606  | 0.185969  | 0.036746  | 1393.1222 | 1432.8543 | 1487.7723 |
|                                  | C        | 1.718586  | 0.174817  | 0.006846  | 1830.1157 | 2898.5948 | 2953.7283 |
|                                  | O        | 1.271846  | -1.077978 | 0.037695  | 3016.4698 | 3040.5869 | 3564.0999 |
|                                  | O        | 1.029791  | 1.166941  | -0.045413 |           |           |           |
| H                                | 0.290258 | -1.046493 | 0.006753  |           |           |           |           |
| FA-O                             | C        | 1.728702  | -0.273866 | -0.000203 | 19.7695   | 44.904    | 70.3061   |
|                                  | H        | 2.822251  | -0.46182  | -0.000849 | 86.0592   | 115.353   | 643.9264  |
|                                  | O        | 0.878744  | -1.125938 | 0.000093  | 711.9065  | 1064.7553 | 1162.8963 |
|                                  | O        | 1.500783  | 1.047705  | 0.000196  | 1333.8011 | 1412.7659 | 1685.2736 |
|                                  | H        | 0.535733  | 1.170463  | 0.000763  | 1850.8268 | 3030.6255 | 3783.5033 |
|                                  | O        | -2.277874 | -0.459265 | 0.000198  |           |           |           |
|                                  | O        | -1.817928 | 0.654317  | -0.000324 |           |           |           |
| FA                               | C        | 0         | 0.420414  | 0         | 635.7155  | 700.6172  | 1063.5703 |
|                                  | H        | -0.384421 | 1.46167   | 0         | 1156.7893 | 1323.4493 | 1408.2646 |
|                                  | O        | 1.161222  | 0.107406  | 0         | 1854.2502 | 3026.8996 | 3776.1448 |
|                                  | O        | -1.031367 | -0.438549 | 0         |           |           |           |
|                                  | H        | -0.654421 | -1.33501  | 0         |           |           |           |
| RC <sub>SHAT</sub> <sup>FA</sup> | C        | -1.663436 | -1.253252 | 0.614523  | 59.8081   | 80.1848   | 90.488    |
|                                  | H        | -1.682601 | -2.303757 | 0.995265  | 97.8871   | 102.3464  | 123.2914  |
|                                  | H        | -2.715353 | -0.905565 | 0.57145   | 148.8262  | 160.0484  | 168.183   |
|                                  | H        | -1.056125 | -0.678676 | 1.342326  | 179.1205  | 201.1012  | 670.3664  |
|                                  | O        | -0.809342 | 1.333412  | -0.797161 | 807.5698  | 921.6678  | 1014.8006 |
|                                  | O        | -1.236489 | 1.800286  | 0.227013  | 1073.7674 | 1132.8015 | 1210.9733 |
|                                  | O        | -1.078442 | -1.321459 | -0.617928 | 1361.6502 | 1366.3041 | 1375.6351 |
|                                  | C        | 2.041238  | 0.055008  | 0.225311  | 1430.6817 | 1502.8576 | 1668.1746 |
|                                  | O        | 1.31054   | 0.210582  | 1.175942  | 1829.2136 | 2888.4979 | 2977.8468 |
|                                  | O        | 1.726678  | -0.580295 | -0.900212 | 3017.936  | 3037.0356 | 3567.6881 |
|                                  | H        | 3.084853  | 0.430708  | 0.173031  |           |           |           |
| H                                | 0.798846 | -0.893458 | -0.822312 |           |           |           |           |
| TS <sub>SHAT</sub> <sup>FA</sup> | C        | 1.415554  | 1.098601  | 0.74184   | -549.7187 | 58.3378   | 97.7218   |
|                                  | H        | 0.675768  | 1.312983  | 1.545317  | 126.9696  | 137.7266  | 167.6795  |
|                                  | H        | 2.444574  | 1.485376  | 0.916727  | 199.0704  | 240.0886  | 280.4461  |
|                                  | H        | 1.568761  | -0.088779 | 0.942188  | 450.2449  | 574.2117  | 679.2445  |
|                                  | O        | 0.985792  | 1.157715  | -0.482056 | 840.0654  | 911.4474  | 1077.5142 |
|                                  | C        | -2.052447 | -0.205342 | 0.188142  | 1085.4505 | 1222.0599 | 1272.0042 |
|                                  | O        | -1.286899 | -0.497473 | 1.079144  | 1276.4336 | 1342.6056 | 1380.4632 |
|                                  | O        | -1.775485 | 0.582285  | -0.844865 | 1444.8331 | 1507.9307 | 1598.7259 |
|                                  | H        | -3.10035  | -0.568026 | 0.125739  | 1824.1558 | 1905.429  | 2905.9775 |
|                                  | H        | -0.836118 | 0.86996   | -0.76281  | 2995.2797 | 3014.7006 | 3499.4333 |
|                                  | O        | 1.439134  | -1.362335 | 0.124075  |           |           |           |
| O                                | 1.021048 | -0.926575 | -0.91968  |           |           |           |           |
| PC <sup>FA</sup>                 | O        | -2.391627 | -0.420634 | 0.238275  | 31.2289   | 54.8199   | 84.3374   |
|                                  | O        | -1.775668 | -1.281229 | -0.549944 | 105.3109  | 118.4852  | 150.5353  |
|                                  | C        | -0.755909 | 1.631242  | 0.535586  | 195.9062  | 213.6264  | 216.1725  |
|                                  | H        | -1.728818 | 2.14977   | 0.685489  | 234.8026  | 407.8224  | 503.4817  |
|                                  | H        | -0.364894 | 1.042554  | 1.399409  | 687.8586  | 940.5425  | 1086.2052 |
|                                  | O        | -0.144256 | 1.721606  | -0.509646 | 1191.1756 | 1243.4762 | 1250.8715 |
|                                  | H        | 1.440803  | 0.888946  | -0.471893 | 1261.3806 | 1393.3826 | 1453.8034 |
|                                  | C        | 2.010627  | -0.790358 | 0.18119   | 1527.103  | 1544.0912 | 1781.461  |
|                                  | O        | 2.288029  | 0.408584  | -0.288626 | 1810.4752 | 2919.7407 | 2995.8456 |
|                                  | O        | 0.89866   | -1.250404 | 0.360658  | 3041.8074 | 3392.8661 | 3477.1864 |
|                                  | H        | 2.938327  | -1.353333 | 0.40857   |           |           |           |
|                                  | H        | -0.814833 | -1.196614 | -0.327965 |           |           |           |

| compound            | geometry |           |           | frequency |           |           |           |
|---------------------|----------|-----------|-----------|-----------|-----------|-----------|-----------|
| TS <sub>uncat</sub> | O        | 1.11791   | -0.579382 | 0.00      | -647.615  | 249.8996  | 288.4955  |
|                     | O        | 1.238127  | 0.629061  | 0.00      | 464.4597  | 587.6052  | 826.5895  |
|                     | H        | -0.171109 | 1.036939  | 0.00      | 1110.2364 | 1252.87   | 1268.1011 |
|                     | C        | -1.269395 | 0.482229  | 0.00      | 1372.8823 | 1518.7819 | 1576.9936 |
|                     | H        | -1.701004 | 0.902441  | 0.939646  | 1829.4982 | 2873.7346 | 2947.2746 |
|                     | H        | -1.701004 | 0.902442  | -0.939645 |           |           |           |
|                     | O        | -0.957351 | -0.766579 | 0.00      |           |           |           |
| PC <sub>uncat</sub> | O        | 1.454169  | 0.756108  | -0.000042 | 58.4905   | 135.8479  | 137.0022  |
|                     | O        | 1.574034  | -0.562584 | 0.000081  | 176.0066  | 216.0374  | 503.8332  |
|                     | H        | 0.640795  | -0.881174 | -0.000196 | 1219.5211 | 1224.0489 | 1264.6915 |
|                     | C        | -1.76334  | 0.44768   | 0.000031  | 1521.3271 | 1525.9385 | 1820.5948 |
|                     | H        | -2.871127 | 0.597463  | 0.00028   | 2894.6064 | 2979.9016 | 3543.6791 |
|                     | H        | -1.123141 | 1.360168  | -0.000096 |           |           |           |
|                     | O        | -1.286514 | -0.663841 | -0.000061 |           |           |           |



Table S2: Bimolecular rate constant  $k_b$  in ( $\text{cm}^3 \text{ molecule}^{-1} \text{ sec}^{-1}$ ) for formic acid catalysed channel within temperature range 213-900 K

| Temp(K) | path A (SHAT)          | path B (SHAT)          | path C (SHAT)          | Uncat                  |
|---------|------------------------|------------------------|------------------------|------------------------|
| 213     | $1.54 \times 10^{-7}$  | $1.51 \times 10^{-14}$ | $5.20 \times 10^{-11}$ | $3.26 \times 10^{-16}$ |
| 216     | $1.22 \times 10^{-7}$  | $1.47 \times 10^{-14}$ | $4.19 \times 10^{-11}$ | $3.50 \times 10^{-16}$ |
| 219     | $9.69 \times 10^{-8}$  | $1.44 \times 10^{-14}$ | $3.40 \times 10^{-11}$ | $3.75 \times 10^{-16}$ |
| 224     | $6.71 \times 10^{-8}$  | $1.38 \times 10^{-14}$ | $2.43 \times 10^{-11}$ | $4.19 \times 10^{-16}$ |
| 230     | $4.42 \times 10^{-8}$  | $1.33 \times 10^{-14}$ | $1.66 \times 10^{-11}$ | $4.77 \times 10^{-16}$ |
| 235     | $3.18 \times 10^{-8}$  | $1.28 \times 10^{-14}$ | $1.22 \times 10^{-11}$ | $5.30 \times 10^{-16}$ |
| 250     | $1.30 \times 10^{-8}$  | $1.17 \times 10^{-14}$ | $5.32 \times 10^{-12}$ | $7.09 \times 10^{-16}$ |
| 259     | $8.00 \times 10^{-9}$  | $1.12 \times 10^{-14}$ | $3.40 \times 10^{-12}$ | $8.34 \times 10^{-16}$ |
| 265     | $5.91 \times 10^{-9}$  | $1.09 \times 10^{-14}$ | $2.56 \times 10^{-12}$ | $9.24 \times 10^{-16}$ |
| 278     | $3.23 \times 10^{-9}$  | $1.03 \times 10^{-14}$ | $1.45 \times 10^{-12}$ | $1.14 \times 10^{-15}$ |
| 280     | $2.96 \times 10^{-9}$  | $1.03 \times 10^{-14}$ | $1.34 \times 10^{-12}$ | $1.18 \times 10^{-15}$ |
| 290     | $1.96 \times 10^{-9}$  | $9.91 \times 10^{-15}$ | $9.05 \times 10^{-13}$ | $1.37 \times 10^{-15}$ |
| 298     | $1.44 \times 10^{-9}$  | $9.67 \times 10^{-15}$ | $6.75 \times 10^{-13}$ | $1.53 \times 10^{-15}$ |
| 300     | $1.33 \times 10^{-9}$  | $9.62 \times 10^{-15}$ | $6.29 \times 10^{-13}$ | $1.58 \times 10^{-15}$ |
| 310     | $9.34 \times 10^{-10}$ | $9.36 \times 10^{-15}$ | $4.48 \times 10^{-13}$ | $1.80 \times 10^{-15}$ |
| 320     | $6.72 \times 10^{-10}$ | $9.15 \times 10^{-15}$ | $3.27 \times 10^{-13}$ | $2.05 \times 10^{-15}$ |
| 330     | $4.94 \times 10^{-10}$ | $8.97 \times 10^{-15}$ | $2.43 \times 10^{-13}$ | $2.32 \times 10^{-15}$ |
| 350     | $2.84 \times 10^{-10}$ | $8.68 \times 10^{-15}$ | $1.43 \times 10^{-13}$ | $2.91 \times 10^{-15}$ |
| 375     | $1.57 \times 10^{-10}$ | $8.43 \times 10^{-15}$ | $7.98 \times 10^{-14}$ | $3.77 \times 10^{-15}$ |
| 400     | $9.46 \times 10^{-11}$ | $8.28 \times 10^{-15}$ | $4.84 \times 10^{-14}$ | $4.77 \times 10^{-15}$ |
| 425     | $6.12 \times 10^{-11}$ | $8.21 \times 10^{-15}$ | $3.14 \times 10^{-14}$ | $5.90 \times 10^{-15}$ |
| 450     | $4.20 \times 10^{-11}$ | $8.20 \times 10^{-15}$ | $2.15 \times 10^{-14}$ | $7.19 \times 10^{-15}$ |
| 475     | $3.02 \times 10^{-11}$ | $8.24 \times 10^{-15}$ | $1.54 \times 10^{-14}$ | $8.62 \times 10^{-15}$ |
| 500     | $2.27 \times 10^{-11}$ | $8.31 \times 10^{-15}$ | $1.15 \times 10^{-14}$ | $1.02 \times 10^{-14}$ |
| 550     | $1.41 \times 10^{-11}$ | $8.57 \times 10^{-15}$ | $7.06 \times 10^{-15}$ | $1.39 \times 10^{-14}$ |
| 600     | $9.76 \times 10^{-12}$ | $8.93 \times 10^{-15}$ | $4.78 \times 10^{-15}$ | $1.82 \times 10^{-14}$ |
| 650     | $7.28 \times 10^{-12}$ | $9.38 \times 10^{-15}$ | $3.49 \times 10^{-15}$ | $2.32 \times 10^{-14}$ |
| 700     | $5.76 \times 10^{-12}$ | $9.93 \times 10^{-15}$ | $2.71 \times 10^{-15}$ | $2.91 \times 10^{-14}$ |
| 725     | $5.22 \times 10^{-12}$ | $1.02 \times 10^{-14}$ | $2.43 \times 10^{-15}$ | $3.23 \times 10^{-14}$ |
| 775     | $4.42 \times 10^{-12}$ | $1.09 \times 10^{-14}$ | $2.02 \times 10^{-15}$ | $3.93 \times 10^{-14}$ |
| 800     | $4.12 \times 10^{-12}$ | $1.12 \times 10^{-14}$ | $1.86 \times 10^{-15}$ | $4.32 \times 10^{-14}$ |
| 825     | $3.87 \times 10^{-12}$ | $1.16 \times 10^{-14}$ | $1.73 \times 10^{-15}$ | $4.73 \times 10^{-14}$ |
| 850     | $3.65 \times 10^{-12}$ | $1.20 \times 10^{-14}$ | $1.62 \times 10^{-15}$ | $5.16 \times 10^{-14}$ |
| 875     | $3.47 \times 10^{-12}$ | $1.24 \times 10^{-14}$ | $1.53 \times 10^{-15}$ | $5.61 \times 10^{-14}$ |
| 900     | $3.32 \times 10^{-12}$ | $1.28 \times 10^{-14}$ | $1.45 \times 10^{-15}$ | $6.09 \times 10^{-14}$ |

Table S3: Bimolecular rate constant  $k_b$  in ( $\text{cm}^3 \text{ molecule}^{-1} \text{ sec}^{-1}$ ) for ammonia catalysed channel within temperature range 213-900 K

| Temp(K) | path A (SHAT)          | path B (SHAT)          | path C (SHAT)          | path D                 | Uncat                  |
|---------|------------------------|------------------------|------------------------|------------------------|------------------------|
| 213     | $1.34 \times 10^{-11}$ | $2.23 \times 10^{-15}$ | $1.55 \times 10^{-15}$ | $4.07 \times 10^{-23}$ | $3.26 \times 10^{-16}$ |
| 216     | $1.28 \times 10^{-11}$ | $2.27 \times 10^{-15}$ | $1.48 \times 10^{-15}$ | $4.46 \times 10^{-23}$ | $3.50 \times 10^{-16}$ |
| 219     | $1.21 \times 10^{-11}$ | $2.32 \times 10^{-15}$ | $1.41 \times 10^{-15}$ | $4.92 \times 10^{-23}$ | $3.75 \times 10^{-16}$ |
| 224     | $1.13 \times 10^{-11}$ | $2.39 \times 10^{-15}$ | $1.31 \times 10^{-15}$ | $5.84 \times 10^{-23}$ | $4.19 \times 10^{-16}$ |
| 230     | $1.03 \times 10^{-11}$ | $2.49 \times 10^{-15}$ | $1.20 \times 10^{-15}$ | $7.26 \times 10^{-23}$ | $4.77 \times 10^{-16}$ |
| 235     | $9.68 \times 10^{-12}$ | $2.56 \times 10^{-15}$ | $1.12 \times 10^{-15}$ | $8.80 \times 10^{-23}$ | $5.30 \times 10^{-16}$ |
| 250     | $8.14 \times 10^{-12}$ | $2.80 \times 10^{-15}$ | $9.39 \times 10^{-16}$ | $1.61 \times 10^{-22}$ | $7.09 \times 10^{-16}$ |
| 259     | $7.46 \times 10^{-12}$ | $2.95 \times 10^{-15}$ | $8.55 \times 10^{-16}$ | $2.35 \times 10^{-22}$ | $8.34 \times 10^{-16}$ |
| 265     | $7.07 \times 10^{-12}$ | $3.05 \times 10^{-15}$ | $8.06 \times 10^{-16}$ | $3.03 \times 10^{-22}$ | $9.24 \times 10^{-16}$ |
| 278     | $6.39 \times 10^{-12}$ | $3.27 \times 10^{-15}$ | $7.18 \times 10^{-16}$ | $5.24 \times 10^{-22}$ | $1.14 \times 10^{-15}$ |
| 280     | $6.30 \times 10^{-12}$ | $3.30 \times 10^{-15}$ | $7.06 \times 10^{-16}$ | $5.69 \times 10^{-22}$ | $1.18 \times 10^{-15}$ |
| 290     | $5.90 \times 10^{-12}$ | $3.48 \times 10^{-15}$ | $6.54 \times 10^{-16}$ | $8.60 \times 10^{-22}$ | $1.37 \times 10^{-15}$ |
| 298     | $5.63 \times 10^{-12}$ | $3.62 \times 10^{-15}$ | $6.18 \times 10^{-16}$ | $1.19 \times 10^{-21}$ | $1.53 \times 10^{-15}$ |
| 300     | $5.57 \times 10^{-12}$ | $3.66 \times 10^{-15}$ | $6.10 \times 10^{-16}$ | $1.29 \times 10^{-21}$ | $1.58 \times 10^{-15}$ |
| 310     | $5.30 \times 10^{-12}$ | $3.84 \times 10^{-15}$ | $5.72 \times 10^{-16}$ | $1.90 \times 10^{-21}$ | $1.80 \times 10^{-15}$ |
| 320     | $5.08 \times 10^{-12}$ | $4.03 \times 10^{-15}$ | $5.40 \times 10^{-16}$ | $2.78 \times 10^{-21}$ | $2.05 \times 10^{-15}$ |
| 330     | $4.89 \times 10^{-12}$ | $4.22 \times 10^{-15}$ | $5.12 \times 10^{-16}$ | $4.01 \times 10^{-21}$ | $2.32 \times 10^{-15}$ |
| 350     | $4.61 \times 10^{-12}$ | $4.61 \times 10^{-15}$ | $4.68 \times 10^{-16}$ | $8.02 \times 10^{-21}$ | $2.91 \times 10^{-15}$ |
| 375     | $4.38 \times 10^{-12}$ | $5.13 \times 10^{-15}$ | $4.27 \times 10^{-16}$ | $1.78 \times 10^{-20}$ | $3.77 \times 10^{-15}$ |
| 400     | $4.24 \times 10^{-12}$ | $5.67 \times 10^{-15}$ | $3.98 \times 10^{-16}$ | $3.67 \times 10^{-20}$ | $4.77 \times 10^{-15}$ |
| 425     | $4.18 \times 10^{-12}$ | $6.24 \times 10^{-15}$ | $3.77 \times 10^{-16}$ | $7.11 \times 10^{-20}$ | $5.90 \times 10^{-15}$ |
| 450     | $4.17 \times 10^{-12}$ | $6.84 \times 10^{-15}$ | $3.62 \times 10^{-16}$ | $1.30 \times 10^{-19}$ | $7.19 \times 10^{-15}$ |
| 475     | $4.20 \times 10^{-12}$ | $7.47 \times 10^{-15}$ | $3.51 \times 10^{-16}$ | $2.26 \times 10^{-19}$ | $8.62 \times 10^{-15}$ |
| 500     | $4.27 \times 10^{-12}$ | $8.13 \times 10^{-15}$ | $3.44 \times 10^{-16}$ | $3.76 \times 10^{-19}$ | $1.02 \times 10^{-14}$ |
| 550     | $4.49 \times 10^{-12}$ | $9.56 \times 10^{-15}$ | $3.38 \times 10^{-16}$ | $9.33 \times 10^{-19}$ | $1.39 \times 10^{-14}$ |
| 600     | $4.80 \times 10^{-12}$ | $1.11 \times 10^{-14}$ | $3.39 \times 10^{-16}$ | $2.05 \times 10^{-18}$ | $1.82 \times 10^{-14}$ |
| 650     | $5.19 \times 10^{-12}$ | $1.29 \times 10^{-14}$ | $3.47 \times 10^{-16}$ | $4.09 \times 10^{-18}$ | $2.32 \times 10^{-14}$ |
| 700     | $5.65 \times 10^{-12}$ | $1.47 \times 10^{-14}$ | $3.59 \times 10^{-16}$ | $7.53 \times 10^{-18}$ | $2.91 \times 10^{-14}$ |
| 725     | $5.91 \times 10^{-12}$ | $1.58 \times 10^{-14}$ | $3.67 \times 10^{-16}$ | $9.98 \times 10^{-18}$ | $3.23 \times 10^{-14}$ |
| 775     | $6.49 \times 10^{-12}$ | $1.79 \times 10^{-14}$ | $3.84 \times 10^{-16}$ | $1.68 \times 10^{-17}$ | $3.93 \times 10^{-14}$ |
| 800     | $6.80 \times 10^{-12}$ | $1.90 \times 10^{-14}$ | $3.94 \times 10^{-16}$ | $2.14 \times 10^{-17}$ | $4.32 \times 10^{-14}$ |
| 825     | $7.14 \times 10^{-12}$ | $2.02 \times 10^{-14}$ | $4.06 \times 10^{-16}$ | $2.69 \times 10^{-17}$ | $4.73 \times 10^{-14}$ |
| 850     | $7.48 \times 10^{-12}$ | $2.15 \times 10^{-14}$ | $4.17 \times 10^{-16}$ | $3.35 \times 10^{-17}$ | $5.16 \times 10^{-14}$ |
| 875     | $7.85 \times 10^{-12}$ | $2.28 \times 10^{-14}$ | $4.29 \times 10^{-16}$ | $4.13 \times 10^{-17}$ | $5.61 \times 10^{-14}$ |
| 900     | $8.23 \times 10^{-12}$ | $2.41 \times 10^{-14}$ | $4.42 \times 10^{-16}$ | $5.05 \times 10^{-17}$ | $6.09 \times 10^{-14}$ |

Table S4: Relative energies (  $\Delta E_{AM}$  ) including ZPE in kcal mol<sup>-1</sup> for the complexes of AM catalyzed channels with respect to the isolated reactants at the MN15L/aug-cc-pVTZ level of theory

| complexes          | $\Delta E_{WM}$ |
|--------------------|-----------------|
| M-O                | 0.54            |
| M-AM               | -2.31           |
| AM-O               | -0.45           |
| RC <sub>DHAT</sub> | -4.68           |
| RC <sub>SHAT</sub> | -2.55           |
| TS <sub>DHAT</sub> | 9.29            |
| TS <sub>SHAT</sub> | -0.99           |
| PC                 | -38.41          |
| product            | -26.09          |

Table S5: Relative energies (  $\Delta E_{FA}$  ) including ZPE in kcal mol<sup>-1</sup> for the complexes of FA catalyzed channels with respect to the isolated reactants at the MN15L/aug-cc-pVTZ level of theory

| complexes          | $\Delta E_{WM}$ |
|--------------------|-----------------|
| M-O                | 0.54            |
| M-FA               | -6.81           |
| FA-O               | -1.21           |
| RC <sub>SHAT</sub> | -9.59           |
| TS <sub>SHAT</sub> | -6.77           |
| PC                 | -41.52          |
| product            | -26.09          |

Table S6: Termolecular rate constant  $k_t$  in ( $\text{cm}^6 \text{ molecule}^{-2} \text{ sec}^{-1}$ ) for formic acid catalysed channel within temperature range 213-900K

| Temp(K) | pathA                  |                        |                       |                        | pathB                  |                        |                       |                        | pathC                  |                        |                       |                        |
|---------|------------------------|------------------------|-----------------------|------------------------|------------------------|------------------------|-----------------------|------------------------|------------------------|------------------------|-----------------------|------------------------|
|         | $K_{eq1}$              | $K_{eq2}$              | $k_{uni}$             | $k_t$                  | $K_{eq1}$              | $K_{eq2}$              | $k_{uni}$             | $k_t$                  | $K_{eq1}$              | $K_{eq2}$              | $k_{uni}$             | $k_t$                  |
| 213     | $1.26 \times 10^{-26}$ | $2.28 \times 10^{-16}$ | $6.76 \times 10^8$    | $1.95 \times 10^{-33}$ | $1.29 \times 10^{-19}$ | $2.24 \times 10^{-23}$ | $6.76 \times 10^8$    | $1.95 \times 10^{-33}$ | $3.75 \times 10^{-23}$ | $7.69 \times 10^{-20}$ | $6.76 \times 10^8$    | $1.95 \times 10^{-33}$ |
| 216     | $1.27 \times 10^{-26}$ | $1.70 \times 10^{-16}$ | $7.18 \times 10^8$    | $1.54 \times 10^{-33}$ | $1.05 \times 10^{-19}$ | $2.05 \times 10^{-23}$ | $7.18 \times 10^8$    | $1.54 \times 10^{-33}$ | $3.68 \times 10^{-23}$ | $5.84 \times 10^{-20}$ | $7.18 \times 10^8$    | $1.54 \times 10^{-33}$ |
| 219     | $1.27 \times 10^{-26}$ | $1.27 \times 10^{-16}$ | $7.61 \times 10^8$    | $1.23 \times 10^{-33}$ | $8.53 \times 10^{-20}$ | $1.89 \times 10^{-23}$ | $7.61 \times 10^8$    | $1.23 \times 10^{-33}$ | $3.61 \times 10^{-23}$ | $4.47 \times 10^{-20}$ | $7.61 \times 10^8$    | $1.23 \times 10^{-33}$ |
| 224     | $1.27 \times 10^{-26}$ | $8.03 \times 10^{-17}$ | $8.36 \times 10^8$    | $8.53 \times 10^{-34}$ | $6.16 \times 10^{-20}$ | $1.66 \times 10^{-23}$ | $8.36 \times 10^8$    | $8.53 \times 10^{-34}$ | $3.51 \times 10^{-23}$ | $2.91 \times 10^{-20}$ | $8.36 \times 10^8$    | $8.53 \times 10^{-34}$ |
| 230     | $1.28 \times 10^{-26}$ | $4.76 \times 10^{-17}$ | $9.30 \times 10^8$    | $5.64 \times 10^{-34}$ | $4.26 \times 10^{-20}$ | $1.43 \times 10^{-23}$ | $9.30 \times 10^8$    | $5.64 \times 10^{-34}$ | $3.41 \times 10^{-23}$ | $1.78 \times 10^{-20}$ | $9.30 \times 10^8$    | $5.64 \times 10^{-34}$ |
| 235     | $1.28 \times 10^{-26}$ | $3.15 \times 10^{-17}$ | $1.01 \times 10^9$    | $4.07 \times 10^{-34}$ | $3.18 \times 10^{-20}$ | $1.27 \times 10^{-23}$ | $1.01 \times 10^9$    | $4.07 \times 10^{-34}$ | $3.33 \times 10^{-23}$ | $1.21 \times 10^{-20}$ | $1.01 \times 10^9$    | $4.07 \times 10^{-34}$ |
| 250     | $1.29 \times 10^{-26}$ | $1.02 \times 10^{-17}$ | $1.28 \times 10^9$    | $1.67 \times 10^{-34}$ | $1.43 \times 10^{-20}$ | $9.19 \times 10^{-24}$ | $1.28 \times 10^9$    | $1.67 \times 10^{-34}$ | $3.14 \times 10^{-23}$ | $4.17 \times 10^{-21}$ | $1.28 \times 10^9$    | $1.67 \times 10^{-34}$ |
| 259     | $1.30 \times 10^{-26}$ | $5.53 \times 10^{-18}$ | $1.45 \times 10^9$    | $1.04 \times 10^{-34}$ | $9.26 \times 10^{-21}$ | $7.75 \times 10^{-24}$ | $1.45 \times 10^9$    | $1.04 \times 10^{-34}$ | $3.06 \times 10^{-23}$ | $2.35 \times 10^{-21}$ | $1.45 \times 10^9$    | $1.04 \times 10^{-34}$ |
| 265     | $1.30 \times 10^{-26}$ | $3.78 \times 10^{-18}$ | $1.57 \times 10^9$    | $7.70 \times 10^{-35}$ | $7.07 \times 10^{-21}$ | $6.96 \times 10^{-24}$ | $1.57 \times 10^9$    | $7.70 \times 10^{-35}$ | $3.01 \times 10^{-23}$ | $1.64 \times 10^{-21}$ | $1.57 \times 10^9$    | $7.70 \times 10^{-35}$ |
| 278     | $1.32 \times 10^{-26}$ | $1.76 \times 10^{-18}$ | $1.83 \times 10^9$    | $4.25 \times 10^{-35}$ | $4.12 \times 10^{-21}$ | $5.64 \times 10^{-24}$ | $1.83 \times 10^9$    | $4.25 \times 10^{-35}$ | $2.93 \times 10^{-23}$ | $7.93 \times 10^{-22}$ | $1.83 \times 10^9$    | $4.25 \times 10^{-35}$ |
| 280     | $1.32 \times 10^{-26}$ | $1.58 \times 10^{-18}$ | $1.88 \times 10^9$    | $3.91 \times 10^{-35}$ | $3.81 \times 10^{-21}$ | $5.47 \times 10^{-24}$ | $1.88 \times 10^9$    | $3.90 \times 10^{-35}$ | $2.92 \times 10^{-23}$ | $7.14 \times 10^{-22}$ | $1.88 \times 10^9$    | $3.90 \times 10^{-35}$ |
| 290     | $1.33 \times 10^{-26}$ | $9.35 \times 10^{-19}$ | $2.09 \times 10^9$    | $2.60 \times 10^{-35}$ | $2.62 \times 10^{-21}$ | $4.74 \times 10^{-24}$ | $2.09 \times 10^9$    | $2.60 \times 10^{-35}$ | $2.87 \times 10^{-23}$ | $4.32 \times 10^{-22}$ | $2.09 \times 10^9$    | $2.60 \times 10^{-35}$ |
| 298     | $1.34 \times 10^{-26}$ | $6.32 \times 10^{-19}$ | $2.27 \times 10^9$    | $1.92 \times 10^{-35}$ | $1.98 \times 10^{-21}$ | $4.26 \times 10^{-24}$ | $2.27 \times 10^9$    | $1.92 \times 10^{-35}$ | $2.85 \times 10^{-23}$ | $2.97 \times 10^{-22}$ | $2.27 \times 10^9$    | $1.92 \times 10^{-35}$ |
| 300     | $1.34 \times 10^{-26}$ | $5.75 \times 10^{-19}$ | $2.32 \times 10^9$    | $1.78 \times 10^{-35}$ | $1.86 \times 10^{-21}$ | $4.15 \times 10^{-24}$ | $2.32 \times 10^9$    | $1.78 \times 10^{-35}$ | $2.84 \times 10^{-23}$ | $2.71 \times 10^{-22}$ | $2.32 \times 10^9$    | $1.78 \times 10^{-35}$ |
| 310     | $1.35 \times 10^{-26}$ | $3.67 \times 10^{-19}$ | $2.55 \times 10^9$    | $1.26 \times 10^{-35}$ | $1.35 \times 10^{-21}$ | $3.68 \times 10^{-24}$ | $2.55 \times 10^9$    | $1.26 \times 10^{-35}$ | $2.82 \times 10^{-23}$ | $1.76 \times 10^{-22}$ | $2.55 \times 10^9$    | $1.26 \times 10^{-35}$ |
| 320     | $1.36 \times 10^{-26}$ | $2.42 \times 10^{-19}$ | $2.78 \times 10^9$    | $9.15 \times 10^{-36}$ | $1.00 \times 10^{-21}$ | $3.29 \times 10^{-24}$ | $2.78 \times 10^9$    | $9.15 \times 10^{-36}$ | $2.80 \times 10^{-23}$ | $1.17 \times 10^{-22}$ | $2.78 \times 10^9$    | $9.15 \times 10^{-36}$ |
| 330     | $1.38 \times 10^{-26}$ | $1.64 \times 10^{-19}$ | $3.02 \times 10^9$    | $6.79 \times 10^{-36}$ | $7.58 \times 10^{-22}$ | $2.97 \times 10^{-24}$ | $3.02 \times 10^9$    | $6.80 \times 10^{-36}$ | $2.79 \times 10^{-23}$ | $8.05 \times 10^{-23}$ | $3.02 \times 10^9$    | $6.79 \times 10^{-36}$ |
| 350     | $1.40 \times 10^{-26}$ | $8.11 \times 10^{-20}$ | $3.51 \times 10^9$    | $3.99 \times 10^{-36}$ | $4.60 \times 10^{-22}$ | $2.47 \times 10^{-24}$ | $3.51 \times 10^9$    | $3.99 \times 10^{-36}$ | $2.80 \times 10^{-23}$ | $4.07 \times 10^{-23}$ | $3.51 \times 10^9$    | $3.99 \times 10^{-36}$ |
| 375     | $1.44 \times 10^{-26}$ | $3.81 \times 10^{-20}$ | $4.13 \times 10^9$    | $2.26 \times 10^{-36}$ | $2.68 \times 10^{-22}$ | $2.04 \times 10^{-24}$ | $4.13 \times 10^9$    | $2.26 \times 10^{-36}$ | $2.83 \times 10^{-23}$ | $1.93 \times 10^{-23}$ | $4.13 \times 10^9$    | $2.26 \times 10^{-36}$ |
| 400     | $1.48 \times 10^{-26}$ | $1.99 \times 10^{-20}$ | $4.75 \times 10^9$    | $1.40 \times 10^{-36}$ | $1.69 \times 10^{-22}$ | $1.75 \times 10^{-24}$ | $4.75 \times 10^9$    | $1.40 \times 10^{-36}$ | $2.89 \times 10^{-23}$ | $1.02 \times 10^{-23}$ | $4.75 \times 10^9$    | $1.40 \times 10^{-36}$ |
| 425     | $1.53 \times 10^{-26}$ | $1.14 \times 10^{-20}$ | $5.36 \times 10^9$    | $9.34 \times 10^{-37}$ | $1.14 \times 10^{-22}$ | $1.53 \times 10^{-24}$ | $5.36 \times 10^9$    | $9.34 \times 10^{-37}$ | $2.97 \times 10^{-23}$ | $5.86 \times 10^{-24}$ | $5.36 \times 10^9$    | $9.34 \times 10^{-37}$ |
| 450     | $1.57 \times 10^{-26}$ | $7.03 \times 10^{-21}$ | $5.97 \times 10^9$    | $6.61 \times 10^{-37}$ | $8.06 \times 10^{-23}$ | $1.37 \times 10^{-24}$ | $5.97 \times 10^9$    | $6.61 \times 10^{-37}$ | $3.07 \times 10^{-23}$ | $3.60 \times 10^{-24}$ | $5.97 \times 10^9$    | $6.61 \times 10^{-37}$ |
| 475     | $1.63 \times 10^{-26}$ | $4.60 \times 10^{-21}$ | $6.57 \times 10^9$    | $4.92 \times 10^{-37}$ | $5.97 \times 10^{-23}$ | $1.25 \times 10^{-24}$ | $6.57 \times 10^9$    | $4.92 \times 10^{-37}$ | $3.18 \times 10^{-23}$ | $2.35 \times 10^{-24}$ | $6.57 \times 10^9$    | $4.92 \times 10^{-37}$ |
| 500     | $1.68 \times 10^{-26}$ | $3.17 \times 10^{-21}$ | $7.16 \times 10^9$    | $3.81 \times 10^{-37}$ | $4.59 \times 10^{-23}$ | $1.16 \times 10^{-24}$ | $7.16 \times 10^9$    | $3.81 \times 10^{-37}$ | $3.31 \times 10^{-23}$ | $1.61 \times 10^{-24}$ | $7.16 \times 10^9$    | $3.81 \times 10^{-37}$ |
| 550     | $1.80 \times 10^{-26}$ | $1.71 \times 10^{-21}$ | $8.28 \times 10^9$    | $2.54 \times 10^{-37}$ | $2.97 \times 10^{-23}$ | $1.04 \times 10^{-24}$ | $8.28 \times 10^9$    | $2.54 \times 10^{-37}$ | $3.60 \times 10^{-23}$ | $8.53 \times 10^{-25}$ | $8.28 \times 10^9$    | $2.54 \times 10^{-37}$ |
| 600     | $1.93 \times 10^{-26}$ | $1.05 \times 10^{-21}$ | $9.34 \times 10^9$    | $1.88 \times 10^{-37}$ | $2.10 \times 10^{-23}$ | $9.56 \times 10^{-25}$ | $9.34 \times 10^9$    | $1.88 \times 10^{-37}$ | $3.93 \times 10^{-23}$ | $5.12 \times 10^{-25}$ | $9.34 \times 10^9$    | $1.88 \times 10^{-37}$ |
| 650     | $2.07 \times 10^{-26}$ | $7.04 \times 10^{-22}$ | $1.03 \times 10^{10}$ | $1.50 \times 10^{-37}$ | $1.60 \times 10^{-23}$ | $9.08 \times 10^{-25}$ | $1.03 \times 10^{10}$ | $1.50 \times 10^{-37}$ | $4.30 \times 10^{-23}$ | $3.38 \times 10^{-25}$ | $1.03 \times 10^{10}$ | $1.50 \times 10^{-37}$ |
| 700     | $2.22 \times 10^{-26}$ | $5.11 \times 10^{-22}$ | $1.13 \times 10^{10}$ | $1.28 \times 10^{-37}$ | $1.29 \times 10^{-23}$ | $8.81 \times 10^{-25}$ | $1.13 \times 10^{10}$ | $1.28 \times 10^{-37}$ | $4.72 \times 10^{-23}$ | $2.40 \times 10^{-25}$ | $1.13 \times 10^{10}$ | $1.28 \times 10^{-37}$ |
| 725     | $2.30 \times 10^{-26}$ | $4.46 \times 10^{-22}$ | $1.17 \times 10^{10}$ | $1.20 \times 10^{-37}$ | $1.17 \times 10^{-23}$ | $8.72 \times 10^{-25}$ | $1.17 \times 10^{10}$ | $1.20 \times 10^{-37}$ | $4.94 \times 10^{-23}$ | $2.07 \times 10^{-25}$ | $1.17 \times 10^{10}$ | $1.20 \times 10^{-37}$ |
| 775     | $2.46 \times 10^{-26}$ | $3.51 \times 10^{-22}$ | $1.26 \times 10^{10}$ | $1.09 \times 10^{-37}$ | $1.00 \times 10^{-23}$ | $8.65 \times 10^{-25}$ | $1.26 \times 10^{10}$ | $1.09 \times 10^{-37}$ | $5.40 \times 10^{-23}$ | $1.60 \times 10^{-25}$ | $1.26 \times 10^{10}$ | $1.09 \times 10^{-37}$ |
| 800     | $2.55 \times 10^{-26}$ | $3.17 \times 10^{-22}$ | $1.30 \times 10^{10}$ | $1.05 \times 10^{-37}$ | $9.36 \times 10^{-24}$ | $8.64 \times 10^{-25}$ | $1.30 \times 10^{10}$ | $1.05 \times 10^{-37}$ | $5.65 \times 10^{-23}$ | $1.43 \times 10^{-25}$ | $1.30 \times 10^{10}$ | $1.05 \times 10^{-37}$ |
| 825     | $2.64 \times 10^{-26}$ | $2.89 \times 10^{-22}$ | $1.34 \times 10^{10}$ | $1.02 \times 10^{-37}$ | $8.81 \times 10^{-24}$ | $8.66 \times 10^{-25}$ | $1.34 \times 10^{10}$ | $1.02 \times 10^{-37}$ | $5.91 \times 10^{-23}$ | $1.29 \times 10^{-25}$ | $1.34 \times 10^{10}$ | $1.02 \times 10^{-37}$ |
| 850     | $2.74 \times 10^{-26}$ | $2.65 \times 10^{-22}$ | $1.38 \times 10^{10}$ | $9.99 \times 10^{-38}$ | $8.35 \times 10^{-24}$ | $8.69 \times 10^{-25}$ | $1.38 \times 10^{10}$ | $1.00 \times 10^{-37}$ | $6.17 \times 10^{-23}$ | $1.18 \times 10^{-25}$ | $1.38 \times 10^{10}$ | $1.00 \times 10^{-37}$ |
| 875     | $2.83 \times 10^{-26}$ | $2.45 \times 10^{-22}$ | $1.42 \times 10^{10}$ | $9.83 \times 10^{-38}$ | $7.95 \times 10^{-24}$ | $8.74 \times 10^{-25}$ | $1.42 \times 10^{10}$ | $9.84 \times 10^{-38}$ | $6.45 \times 10^{-23}$ | $1.08 \times 10^{-25}$ | $1.42 \times 10^{10}$ | $9.84 \times 10^{-38}$ |
| 900     | $2.93 \times 10^{-26}$ | $2.29 \times 10^{-22}$ | $1.45 \times 10^{10}$ | $9.73 \times 10^{-38}$ | $7.60 \times 10^{-24}$ | $8.81 \times 10^{-25}$ | $1.45 \times 10^{10}$ | $9.73 \times 10^{-38}$ | $6.73 \times 10^{-23}$ | $9.95 \times 10^{-26}$ | $1.45 \times 10^{10}$ | $9.73 \times 10^{-38}$ |

Table S7: Termolecular rate constant  $k_t$  in ( $\text{cm}^6 \text{ molecule}^{-2} \text{ sec}^{-1}$ ) for ammonia catalysed channel within temperature range 213-900K

| Temp(K) | path A                 |                        |                       | path B                 |                        |                       | path C                 |                        |                       | path D                 |                        |                        |
|---------|------------------------|------------------------|-----------------------|------------------------|------------------------|-----------------------|------------------------|------------------------|-----------------------|------------------------|------------------------|------------------------|
|         | $K_{ep1}$              | $K_{ep2}$              | $k_t$                  |
| 213     | $1.26 \times 10^{-26}$ | $1.19 \times 10^{-22}$ | $1.12 \times 10^{11}$ | $7.61 \times 10^{-23}$ | $1.98 \times 10^{-26}$ | $1.12 \times 10^{11}$ | $1.09 \times 10^{-22}$ | $1.38 \times 10^{-26}$ | $1.12 \times 10^{11}$ | $1.69 \times 10^{-37}$ | $1.09 \times 10^{-22}$ | $1.69 \times 10^{-37}$ |
| 216     | $1.27 \times 10^{-26}$ | $1.09 \times 10^{-22}$ | $1.17 \times 10^{11}$ | $7.10 \times 10^{-23}$ | $1.94 \times 10^{-26}$ | $1.17 \times 10^{11}$ | $1.09 \times 10^{-22}$ | $1.26 \times 10^{-26}$ | $1.17 \times 10^{11}$ | $1.61 \times 10^{-37}$ | $1.09 \times 10^{-22}$ | $1.61 \times 10^{-37}$ |
| 219     | $1.27 \times 10^{-26}$ | $9.95 \times 10^{-23}$ | $1.22 \times 10^{11}$ | $6.65 \times 10^{-23}$ | $1.90 \times 10^{-26}$ | $1.22 \times 10^{11}$ | $1.09 \times 10^{-22}$ | $1.16 \times 10^{-26}$ | $1.22 \times 10^{11}$ | $1.54 \times 10^{-37}$ | $1.09 \times 10^{-22}$ | $1.54 \times 10^{-37}$ |
| 224     | $1.27 \times 10^{-26}$ | $8.63 \times 10^{-23}$ | $1.31 \times 10^{11}$ | $5.98 \times 10^{-23}$ | $1.83 \times 10^{-26}$ | $1.31 \times 10^{11}$ | $1.09 \times 10^{-22}$ | $1.00 \times 10^{-26}$ | $1.31 \times 10^{11}$ | $1.43 \times 10^{-37}$ | $1.09 \times 10^{-22}$ | $1.43 \times 10^{-37}$ |
| 230     | $1.28 \times 10^{-26}$ | $7.34 \times 10^{-23}$ | $1.41 \times 10^{11}$ | $5.30 \times 10^{-23}$ | $1.76 \times 10^{-26}$ | $1.41 \times 10^{11}$ | $1.10 \times 10^{-22}$ | $8.53 \times 10^{-27}$ | $1.41 \times 10^{11}$ | $1.32 \times 10^{-37}$ | $1.10 \times 10^{-22}$ | $1.32 \times 10^{-37}$ |
| 235     | $1.28 \times 10^{-26}$ | $6.46 \times 10^{-23}$ | $1.50 \times 10^{11}$ | $4.83 \times 10^{-23}$ | $1.71 \times 10^{-26}$ | $1.50 \times 10^{11}$ | $1.10 \times 10^{-22}$ | $7.50 \times 10^{-27}$ | $1.50 \times 10^{11}$ | $1.24 \times 10^{-37}$ | $1.10 \times 10^{-22}$ | $1.24 \times 10^{-37}$ |
| 250     | $1.29 \times 10^{-26}$ | $4.57 \times 10^{-23}$ | $1.78 \times 10^{11}$ | $3.75 \times 10^{-23}$ | $1.57 \times 10^{-26}$ | $1.78 \times 10^{11}$ | $1.12 \times 10^{-22}$ | $5.27 \times 10^{-27}$ | $1.78 \times 10^{11}$ | $1.05 \times 10^{-37}$ | $1.12 \times 10^{-22}$ | $1.05 \times 10^{-37}$ |
| 259     | $1.30 \times 10^{-26}$ | $3.81 \times 10^{-23}$ | $1.96 \times 10^{11}$ | $3.28 \times 10^{-23}$ | $1.51 \times 10^{-26}$ | $1.96 \times 10^{11}$ | $1.13 \times 10^{-22}$ | $4.36 \times 10^{-27}$ | $1.96 \times 10^{11}$ | $9.68 \times 10^{-38}$ | $1.13 \times 10^{-22}$ | $9.68 \times 10^{-38}$ |
| 265     | $1.30 \times 10^{-26}$ | $3.40 \times 10^{-23}$ | $2.08 \times 10^{11}$ | $3.02 \times 10^{-23}$ | $1.47 \times 10^{-26}$ | $2.08 \times 10^{11}$ | $1.14 \times 10^{-22}$ | $3.87 \times 10^{-27}$ | $2.08 \times 10^{11}$ | $9.22 \times 10^{-38}$ | $1.14 \times 10^{-22}$ | $9.22 \times 10^{-38}$ |
| 278     | $1.32 \times 10^{-26}$ | $2.71 \times 10^{-23}$ | $2.35 \times 10^{11}$ | $2.57 \times 10^{-23}$ | $1.39 \times 10^{-26}$ | $2.35 \times 10^{11}$ | $1.17 \times 10^{-22}$ | $3.05 \times 10^{-27}$ | $2.35 \times 10^{11}$ | $8.40 \times 10^{-38}$ | $1.17 \times 10^{-22}$ | $8.40 \times 10^{-38}$ |
| 280     | $1.32 \times 10^{-26}$ | $2.63 \times 10^{-23}$ | $2.40 \times 10^{11}$ | $2.51 \times 10^{-23}$ | $1.38 \times 10^{-26}$ | $2.40 \times 10^{11}$ | $1.17 \times 10^{-22}$ | $2.95 \times 10^{-27}$ | $2.40 \times 10^{11}$ | $8.29 \times 10^{-38}$ | $1.17 \times 10^{-22}$ | $8.29 \times 10^{-38}$ |
| 290     | $1.33 \times 10^{-26}$ | $2.26 \times 10^{-23}$ | $2.62 \times 10^{11}$ | $2.25 \times 10^{-23}$ | $1.33 \times 10^{-26}$ | $2.62 \times 10^{11}$ | $1.20 \times 10^{-22}$ | $2.50 \times 10^{-27}$ | $2.62 \times 10^{11}$ | $7.89 \times 10^{-38}$ | $1.20 \times 10^{-22}$ | $7.89 \times 10^{-38}$ |
| 298     | $1.34 \times 10^{-26}$ | $2.02 \times 10^{-23}$ | $2.79 \times 10^{11}$ | $2.08 \times 10^{-23}$ | $1.30 \times 10^{-26}$ | $2.79 \times 10^{11}$ | $1.22 \times 10^{-22}$ | $2.21 \times 10^{-27}$ | $2.79 \times 10^{11}$ | $7.53 \times 10^{-38}$ | $1.22 \times 10^{-22}$ | $7.53 \times 10^{-38}$ |
| 300     | $1.34 \times 10^{-26}$ | $1.96 \times 10^{-23}$ | $2.84 \times 10^{11}$ | $2.04 \times 10^{-23}$ | $1.29 \times 10^{-26}$ | $2.84 \times 10^{11}$ | $1.22 \times 10^{-22}$ | $2.15 \times 10^{-27}$ | $2.84 \times 10^{11}$ | $7.46 \times 10^{-38}$ | $1.22 \times 10^{-22}$ | $7.46 \times 10^{-38}$ |
| 310     | $1.35 \times 10^{-26}$ | $1.73 \times 10^{-23}$ | $3.07 \times 10^{11}$ | $1.86 \times 10^{-23}$ | $1.25 \times 10^{-26}$ | $3.07 \times 10^{11}$ | $1.25 \times 10^{-22}$ | $1.86 \times 10^{-27}$ | $3.07 \times 10^{11}$ | $7.16 \times 10^{-38}$ | $1.25 \times 10^{-22}$ | $7.16 \times 10^{-38}$ |
| 320     | $1.36 \times 10^{-26}$ | $1.54 \times 10^{-23}$ | $3.30 \times 10^{11}$ | $1.72 \times 10^{-23}$ | $1.22 \times 10^{-26}$ | $3.30 \times 10^{11}$ | $1.28 \times 10^{-22}$ | $1.63 \times 10^{-27}$ | $3.30 \times 10^{11}$ | $6.92 \times 10^{-38}$ | $1.28 \times 10^{-22}$ | $6.92 \times 10^{-38}$ |
| 330     | $1.38 \times 10^{-26}$ | $1.38 \times 10^{-23}$ | $3.54 \times 10^{11}$ | $1.60 \times 10^{-23}$ | $1.19 \times 10^{-26}$ | $3.54 \times 10^{11}$ | $1.31 \times 10^{-22}$ | $1.45 \times 10^{-27}$ | $3.54 \times 10^{11}$ | $6.73 \times 10^{-38}$ | $1.31 \times 10^{-22}$ | $6.73 \times 10^{-38}$ |
| 350     | $1.40 \times 10^{-26}$ | $1.15 \times 10^{-23}$ | $4.02 \times 10^{11}$ | $1.40 \times 10^{-23}$ | $1.15 \times 10^{-26}$ | $4.02 \times 10^{11}$ | $1.38 \times 10^{-22}$ | $1.16 \times 10^{-27}$ | $4.02 \times 10^{11}$ | $6.46 \times 10^{-38}$ | $1.38 \times 10^{-22}$ | $6.46 \times 10^{-38}$ |
| 375     | $1.44 \times 10^{-26}$ | $9.43 \times 10^{-24}$ | $4.65 \times 10^{11}$ | $1.23 \times 10^{-23}$ | $1.10 \times 10^{-26}$ | $4.65 \times 10^{11}$ | $1.48 \times 10^{-22}$ | $9.20 \times 10^{-28}$ | $4.65 \times 10^{11}$ | $6.31 \times 10^{-38}$ | $1.48 \times 10^{-22}$ | $6.31 \times 10^{-38}$ |
| 400     | $1.48 \times 10^{-26}$ | $8.04 \times 10^{-24}$ | $5.28 \times 10^{11}$ | $1.11 \times 10^{-23}$ | $1.07 \times 10^{-26}$ | $5.28 \times 10^{11}$ | $1.58 \times 10^{-22}$ | $7.54 \times 10^{-28}$ | $5.28 \times 10^{11}$ | $6.29 \times 10^{-38}$ | $1.58 \times 10^{-22}$ | $6.29 \times 10^{-38}$ |
| 425     | $1.53 \times 10^{-26}$ | $7.07 \times 10^{-24}$ | $5.92 \times 10^{11}$ | $1.02 \times 10^{-23}$ | $1.05 \times 10^{-26}$ | $5.92 \times 10^{11}$ | $1.69 \times 10^{-22}$ | $6.37 \times 10^{-28}$ | $5.92 \times 10^{11}$ | $6.38 \times 10^{-38}$ | $1.69 \times 10^{-22}$ | $6.38 \times 10^{-38}$ |
| 450     | $1.57 \times 10^{-26}$ | $6.36 \times 10^{-24}$ | $6.56 \times 10^{11}$ | $9.60 \times 10^{-24}$ | $1.04 \times 10^{-26}$ | $6.56 \times 10^{11}$ | $1.82 \times 10^{-22}$ | $5.51 \times 10^{-28}$ | $6.56 \times 10^{11}$ | $6.57 \times 10^{-38}$ | $1.82 \times 10^{-22}$ | $6.57 \times 10^{-38}$ |
| 475     | $1.63 \times 10^{-26}$ | $5.83 \times 10^{-24}$ | $7.21 \times 10^{11}$ | $9.14 \times 10^{-24}$ | $1.04 \times 10^{-26}$ | $7.21 \times 10^{11}$ | $1.94 \times 10^{-22}$ | $4.88 \times 10^{-28}$ | $7.21 \times 10^{11}$ | $6.83 \times 10^{-38}$ | $1.94 \times 10^{-22}$ | $6.83 \times 10^{-38}$ |
| 500     | $1.68 \times 10^{-26}$ | $5.44 \times 10^{-24}$ | $7.85 \times 10^{11}$ | $8.82 \times 10^{-24}$ | $1.04 \times 10^{-26}$ | $7.85 \times 10^{11}$ | $2.08 \times 10^{-22}$ | $4.38 \times 10^{-28}$ | $7.85 \times 10^{11}$ | $7.17 \times 10^{-38}$ | $2.08 \times 10^{-22}$ | $7.17 \times 10^{-38}$ |
| 550     | $1.80 \times 10^{-26}$ | $4.91 \times 10^{-24}$ | $9.13 \times 10^{11}$ | $8.43 \times 10^{-24}$ | $1.05 \times 10^{-26}$ | $9.13 \times 10^{11}$ | $2.38 \times 10^{-22}$ | $3.70 \times 10^{-28}$ | $9.13 \times 10^{11}$ | $8.06 \times 10^{-38}$ | $2.38 \times 10^{-22}$ | $8.06 \times 10^{-38}$ |
| 600     | $1.93 \times 10^{-26}$ | $4.62 \times 10^{-24}$ | $1.04 \times 10^{12}$ | $8.30 \times 10^{-24}$ | $1.07 \times 10^{-26}$ | $1.04 \times 10^{12}$ | $2.72 \times 10^{-22}$ | $3.27 \times 10^{-28}$ | $1.04 \times 10^{12}$ | $9.23 \times 10^{-38}$ | $2.72 \times 10^{-22}$ | $9.23 \times 10^{-38}$ |
| 650     | $2.07 \times 10^{-26}$ | $4.47 \times 10^{-24}$ | $1.16 \times 10^{12}$ | $8.33 \times 10^{-24}$ | $1.11 \times 10^{-26}$ | $1.16 \times 10^{12}$ | $3.09 \times 10^{-22}$ | $2.99 \times 10^{-28}$ | $1.16 \times 10^{12}$ | $1.07 \times 10^{-37}$ | $3.09 \times 10^{-22}$ | $1.07 \times 10^{-37}$ |
| 700     | $2.22 \times 10^{-26}$ | $4.41 \times 10^{-24}$ | $1.28 \times 10^{12}$ | $8.50 \times 10^{-24}$ | $1.15 \times 10^{-26}$ | $1.28 \times 10^{12}$ | $3.49 \times 10^{-22}$ | $2.80 \times 10^{-28}$ | $1.28 \times 10^{12}$ | $1.25 \times 10^{-37}$ | $3.49 \times 10^{-22}$ | $1.25 \times 10^{-37}$ |
| 725     | $2.30 \times 10^{-26}$ | $4.41 \times 10^{-24}$ | $1.34 \times 10^{12}$ | $8.62 \times 10^{-24}$ | $1.17 \times 10^{-26}$ | $1.34 \times 10^{12}$ | $3.70 \times 10^{-22}$ | $2.73 \times 10^{-28}$ | $1.34 \times 10^{12}$ | $1.36 \times 10^{-37}$ | $3.70 \times 10^{-22}$ | $1.36 \times 10^{-37}$ |
| 775     | $2.46 \times 10^{-26}$ | $4.45 \times 10^{-24}$ | $1.46 \times 10^{12}$ | $8.93 \times 10^{-24}$ | $1.23 \times 10^{-26}$ | $1.46 \times 10^{12}$ | $4.16 \times 10^{-22}$ | $2.64 \times 10^{-28}$ | $1.46 \times 10^{12}$ | $1.60 \times 10^{-37}$ | $4.16 \times 10^{-22}$ | $1.60 \times 10^{-37}$ |
| 800     | $2.55 \times 10^{-26}$ | $4.49 \times 10^{-24}$ | $1.51 \times 10^{12}$ | $9.11 \times 10^{-24}$ | $1.26 \times 10^{-26}$ | $1.51 \times 10^{12}$ | $4.40 \times 10^{-22}$ | $2.61 \times 10^{-28}$ | $1.51 \times 10^{12}$ | $1.74 \times 10^{-37}$ | $4.40 \times 10^{-22}$ | $1.74 \times 10^{-37}$ |
| 825     | $2.64 \times 10^{-26}$ | $4.54 \times 10^{-24}$ | $1.57 \times 10^{12}$ | $9.31 \times 10^{-24}$ | $1.29 \times 10^{-26}$ | $1.57 \times 10^{12}$ | $4.65 \times 10^{-22}$ | $2.58 \times 10^{-28}$ | $1.57 \times 10^{12}$ | $1.89 \times 10^{-37}$ | $4.65 \times 10^{-22}$ | $1.89 \times 10^{-37}$ |
| 850     | $2.74 \times 10^{-26}$ | $4.60 \times 10^{-24}$ | $1.63 \times 10^{12}$ | $9.53 \times 10^{-24}$ | $1.32 \times 10^{-26}$ | $1.63 \times 10^{12}$ | $4.91 \times 10^{-22}$ | $2.56 \times 10^{-28}$ | $1.63 \times 10^{12}$ | $2.05 \times 10^{-37}$ | $4.91 \times 10^{-22}$ | $2.05 \times 10^{-37}$ |
| 875     | $2.83 \times 10^{-26}$ | $4.67 \times 10^{-24}$ | $1.68 \times 10^{12}$ | $9.77 \times 10^{-24}$ | $1.35 \times 10^{-26}$ | $1.68 \times 10^{12}$ | $5.18 \times 10^{-22}$ | $2.55 \times 10^{-28}$ | $1.68 \times 10^{12}$ | $2.22 \times 10^{-37}$ | $5.18 \times 10^{-22}$ | $2.22 \times 10^{-37}$ |
| 900     | $2.93 \times 10^{-26}$ | $4.75 \times 10^{-24}$ | $1.74 \times 10^{12}$ | $1.00 \times 10^{-23}$ | $1.39 \times 10^{-26}$ | $1.74 \times 10^{12}$ | $5.45 \times 10^{-22}$ | $2.55 \times 10^{-28}$ | $1.74 \times 10^{12}$ | $2.41 \times 10^{-37}$ | $5.45 \times 10^{-22}$ | $2.41 \times 10^{-37}$ |

## 2 Post-CCSD(T) calculation

Further, to check the reliability of the energetics obtained at MN15L/aug-cc-pVTZ level, we have performed high level (HL) ab initio calculations for the SHAT channel of AM catalyzed reaction. The HL calculation involved the following corrections:

$$\Delta E_{HL} = E_{CCSDT/CBS} + \Delta E_T + \Delta E_{(Q)}$$

1. The CCSD(T)/CBS energy has been calculated by the method proposed by Varandas and Pansini<sup>1</sup> using the single point energies obtained at CCSD(T)/aug-cc-pVnZ (n=T and Q) level of theory.

2. The contribution accounted for the full triple excitation ( $\Delta E_T$ ) at CCSDT/cc-PVDZ level of theory calculated using MRCC<sup>2</sup> code can be expressed as follows.

$$\Delta E_T = E_{CCSDT} - E_{CCSD(T)}$$

3. The contribution accounted for partial quadratic excitation ( $\Delta E_Q$ ) at CCSDT(Q)/cc-pVDZ level of theory calculated using MRCC<sup>2</sup> code can be expressed as follows.

$$\Delta E_{(Q)} = E_{CCSDT(Q)} - E_{CCSDT}$$

Table S8: Absolute energies in (Hartree) for the relevant species at CCSD(T) level of theory.

| Species            | CCSD(T)/aug-cc-pVTZ | CCSD(T)/aug-cc-pVQZ | CCSD(T)/CBS     |
|--------------------|---------------------|---------------------|-----------------|
| TS <sub>SHAT</sub> | -321.4962169        | -321.5778405        | -321.6287234889 |
| NH <sub>3</sub>    | -56.4803997         | -56.4954882         | -56.5049875747  |
| CH <sub>3</sub> O• | -114.8846772        | -114.9135429        | -114.9312152234 |
| O <sub>2</sub>     | -150.140951         | -150.1786758        | -150.2021958701 |

Table S9: Absolute energies in (Hartree) for the relevant species at post CCSD(T) level of theory.

| species            | CCSD(T)/cc-pVDZ | CCSDT/cc-pVDZ   | CCSDT(Q)/cc-pVDZ |
|--------------------|-----------------|-----------------|------------------|
| TS <sub>SHAT</sub> | -321.1329874904 | -321.1418482774 | -321.1491973247  |
| NH <sub>3</sub>    | -56.4026375509  | -56.4029140609  | -56.4032558481   |
| CH <sub>3</sub> O• | -114.7550722855 | -114.7557353041 | -114.7562151674  |
| O <sub>2</sub>     | -149.9856931155 | -149.9858841529 | -149.9877946909  |

### 3 Convergence parameters

The grid size used for all the structure is (grid=ultrafine) having 99 radial shells and 590 angular points per shell and tight SCF convergence criteria used for the geometry optimization of all the species. The others convergence parameters has been listed below.

Table S10: Convergence threshold values for the optimized geometry for all the species.

| Parameters       | Threshold values (a.u) |
|------------------|------------------------|
| Max-Force        | 0.00045                |
| Rms-force        | 0.0003                 |
| Max-displacement | 0.0018                 |
| Rms-displacement | 0.0012                 |

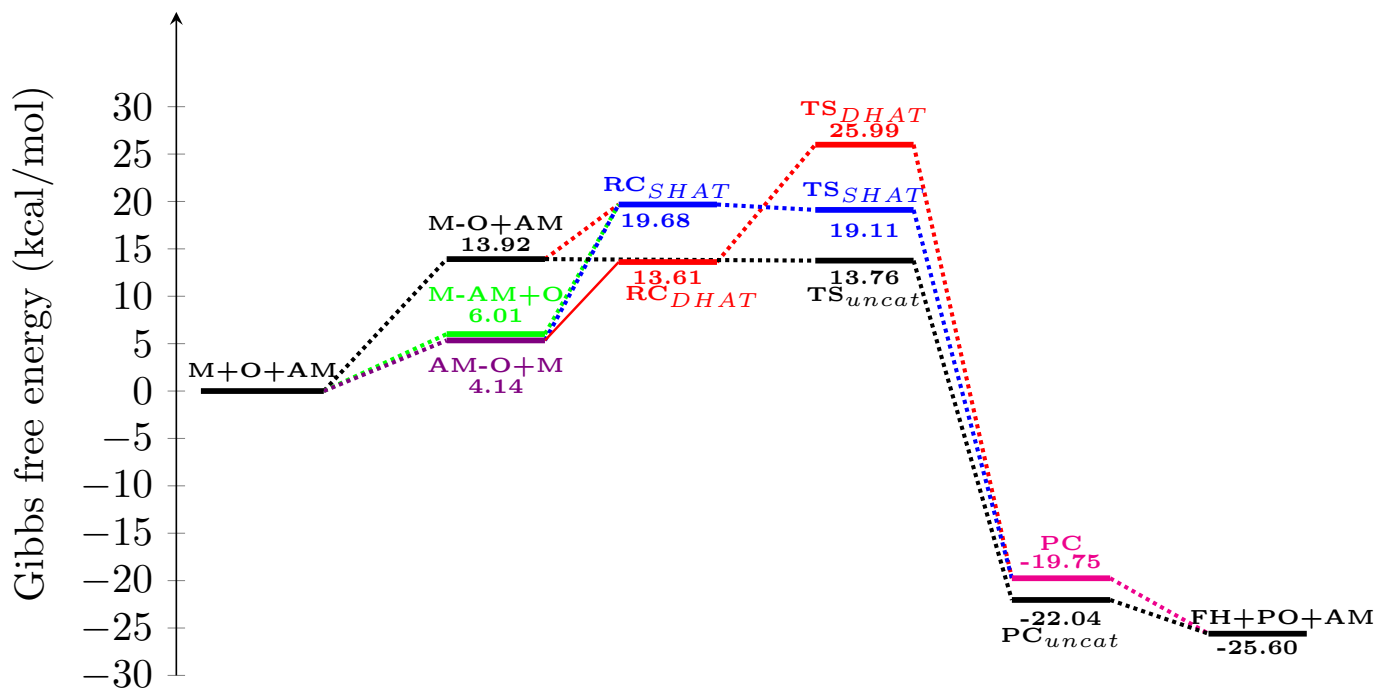

Figure S1: Gibbs free energy profile for  $\text{CH}_3\text{O}^\bullet + \text{O}_2$  reaction in presence of AM calculated at MN15L/aug-cc-pVTZ level, where  $\text{M}=\text{CH}_3\text{O}^\bullet$ ,  $\text{O}=\text{O}_2$ ,  $\text{AM}=\text{NH}_3$ ,  $\text{FH}=\text{CH}_2\text{O}$ ,  $\text{PO}=\text{HO}_2$ ; M-O, M-AM and AM-O are pre-reactive complexes



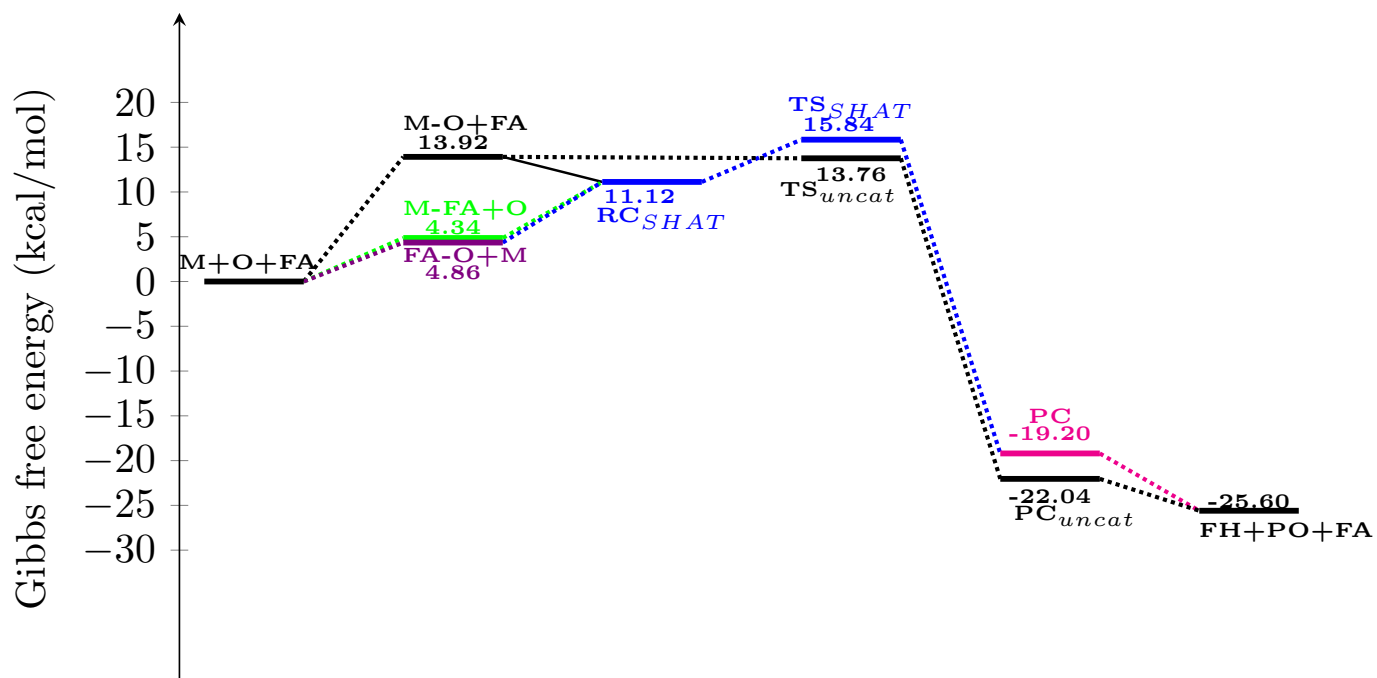

Figure S2: Gibbs free energy profile for  $\text{CH}_3\text{O}^\bullet + \text{O}_2$  reaction in presence of FA calculated at MN15L/aug-cc-pVTZ level, where  $\text{M} = \text{CH}_3\text{O}^\bullet$ ,  $\text{O} = \text{O}_2$ ,  $\text{FA} = \text{HCOOH}$ ,  $\text{FH} = \text{CH}_2\text{O}$ ,  $\text{PO} = \text{HO}_2$ ;  $\text{M-O}$ ,  $\text{M-FA}$  and  $\text{FA-O}$  are pre-reactive complexes

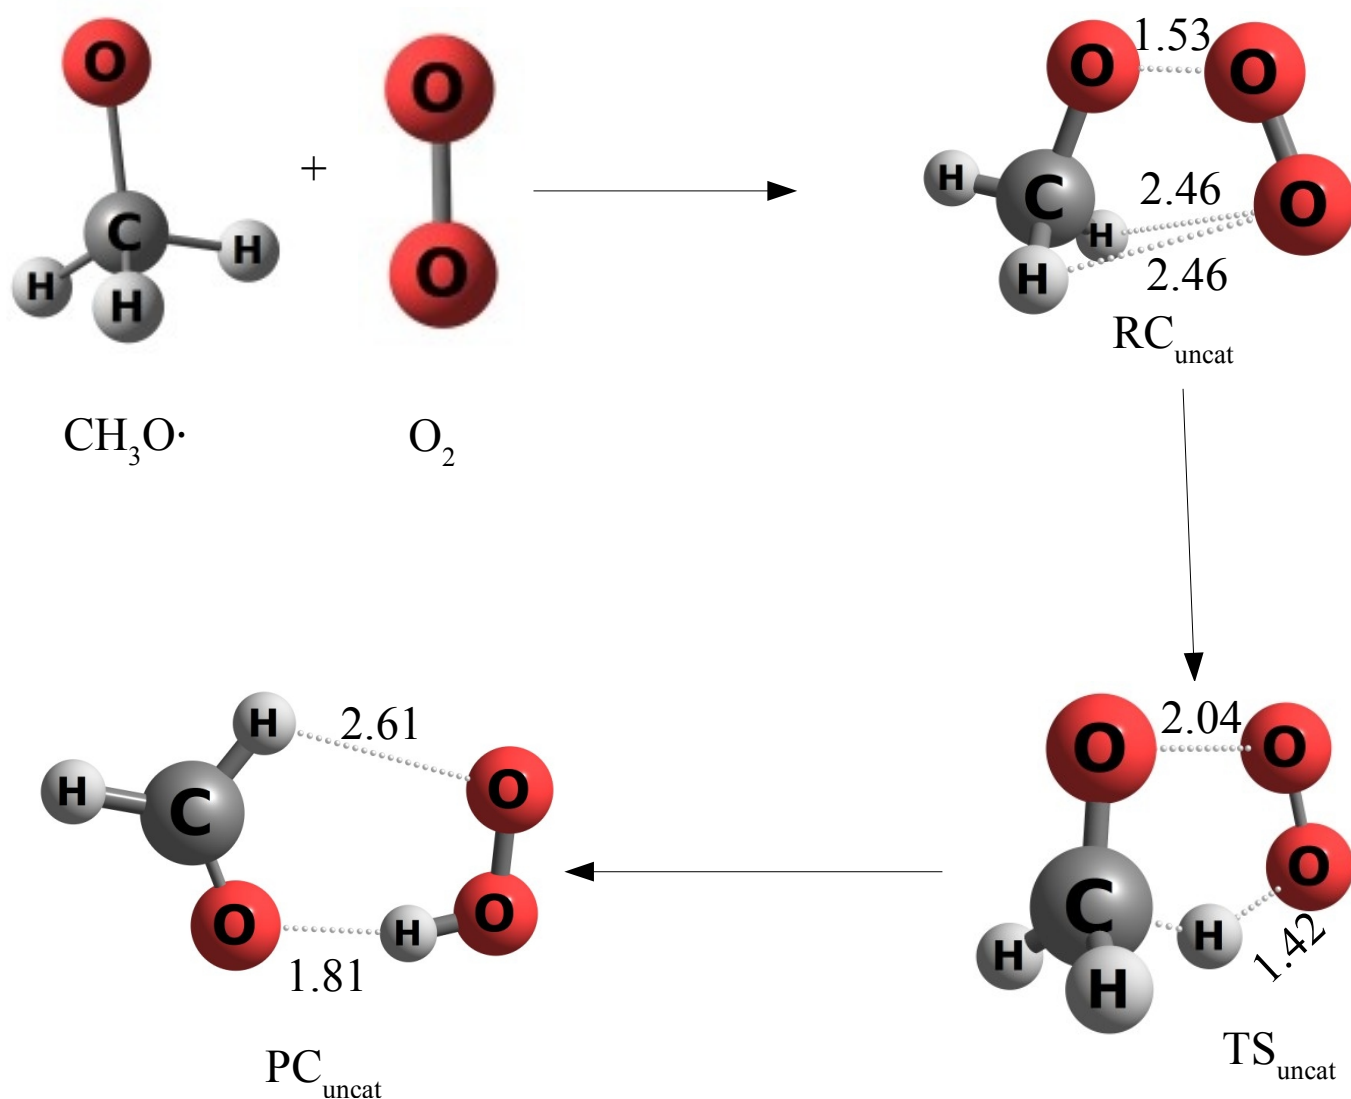

Figure S3: Reaction scheme for the uncat  $\text{CH}_3\text{O}\cdot + \text{O}_2$  reaction, at the geometries obtained at the MN15-L/aug-cc-pVTZ level (the bond lengths are in angstrom)

## References

- (1) Varandas, A.; Pansini, F. *J. Chem. Phys.* **2014**, *141*, 224113.
- (2) Kállay, M.; Rolik, Z.; Csontos, J.; Ladjánszki, I.; Szegedy, L.; Ladóczki, B.; Samu, G.; Petrov, K.; Farkas, M.; Nagy, URL: <http://www.mrcc.hu>, accessed August 26th **2016**,
